# Supplementary material for: SFMBT2-Mediated Infiltration of Preadipocytes and TAMs in Prostate Cancer
Source: MDPI journal article supplement (doi:10.3390/cancers12092718), 2020-09-22
Supplement: s1 [file s1]

**A**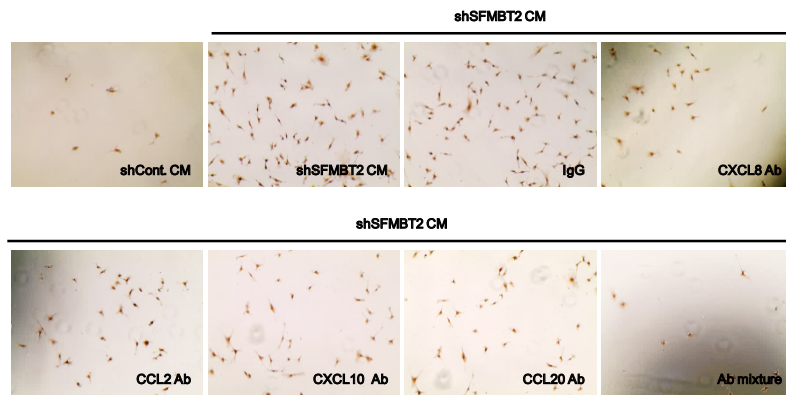**B**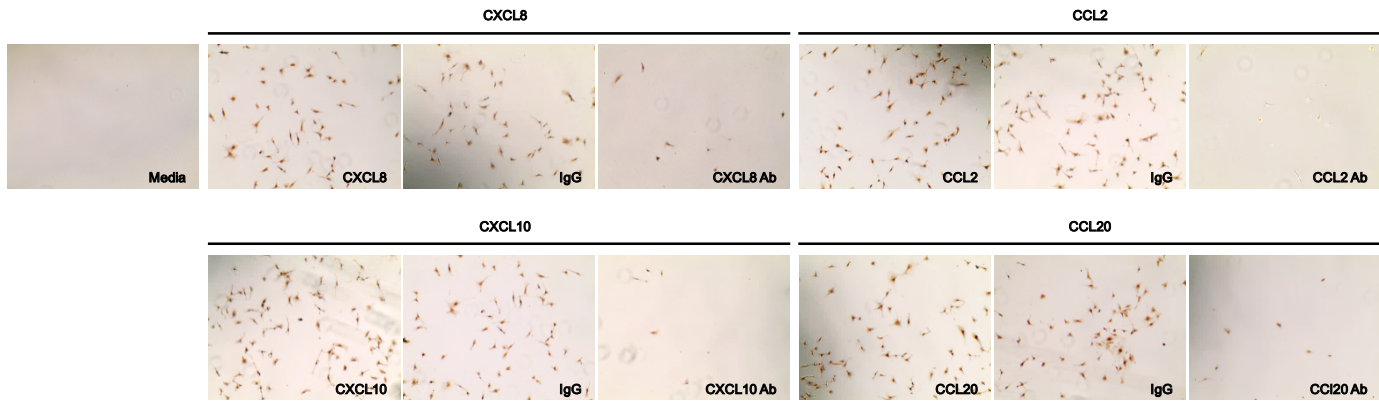**C**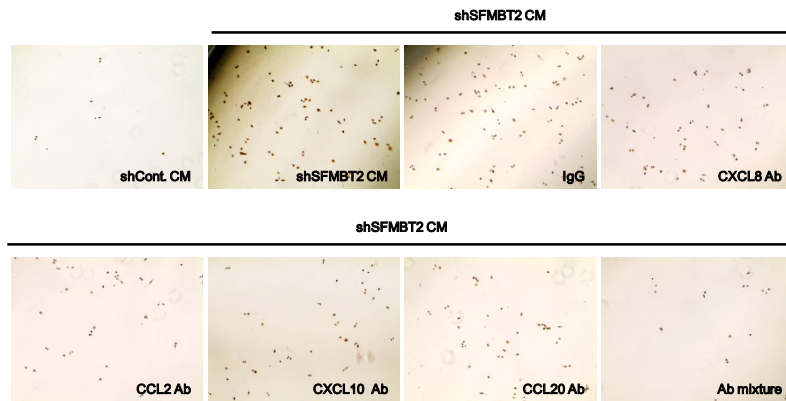**D**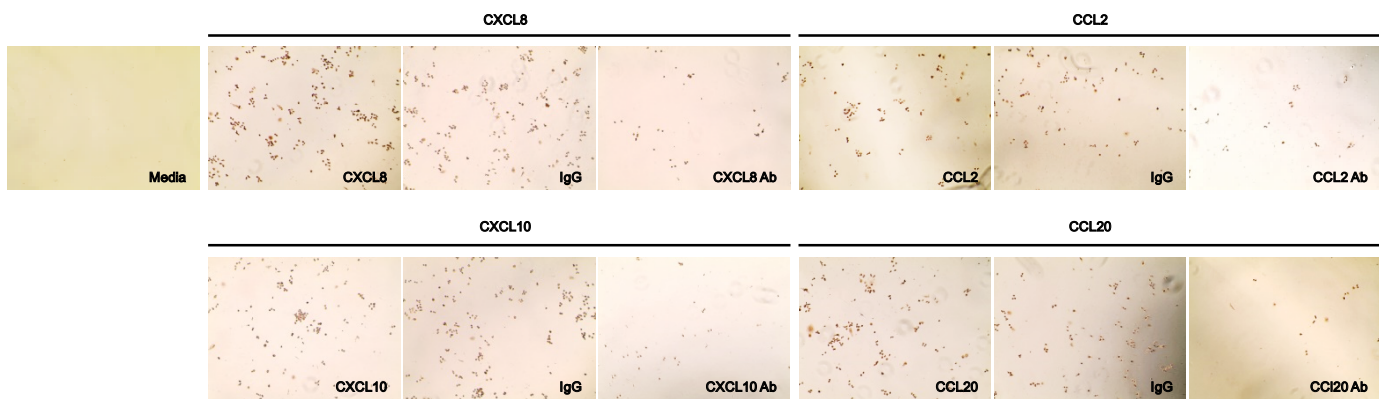

**A**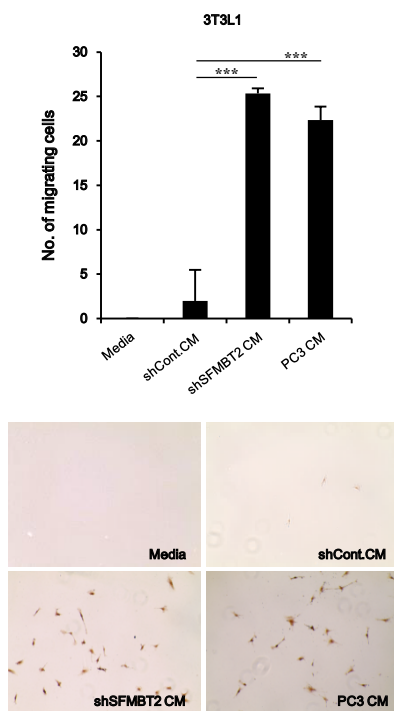**B**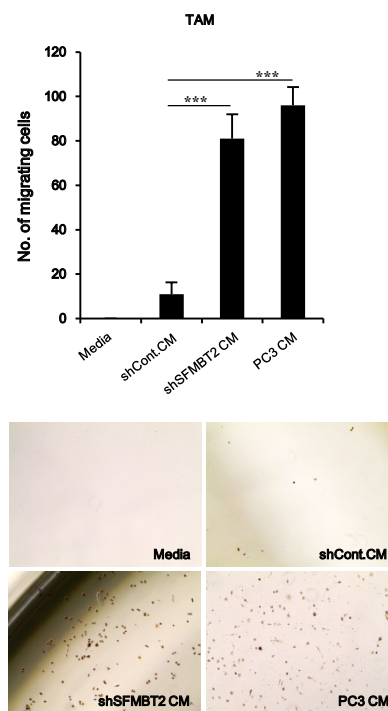**C**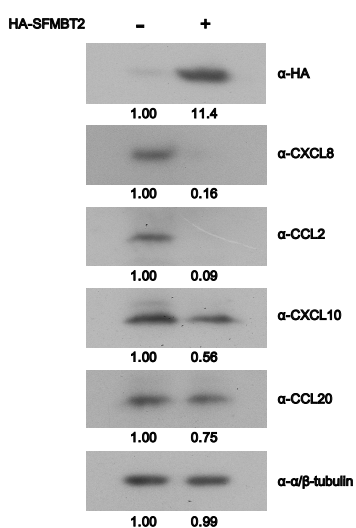**D**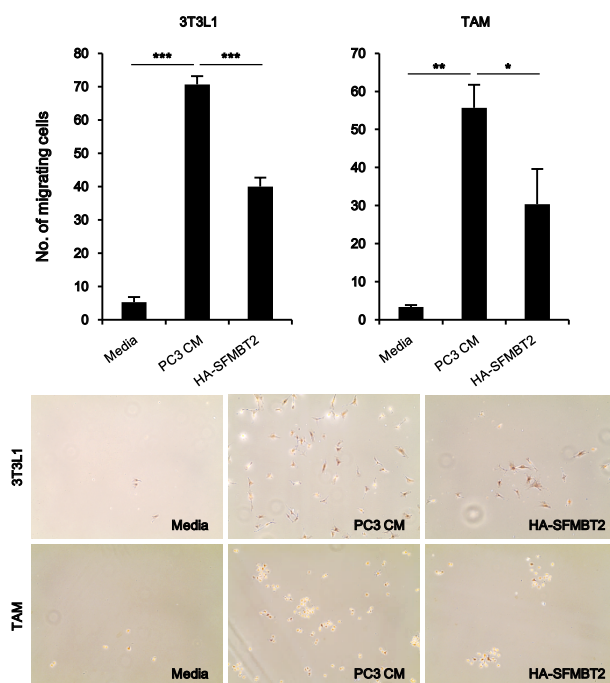

Supplementary Figure S2.

**A**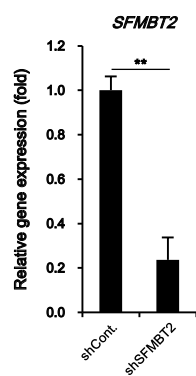**B**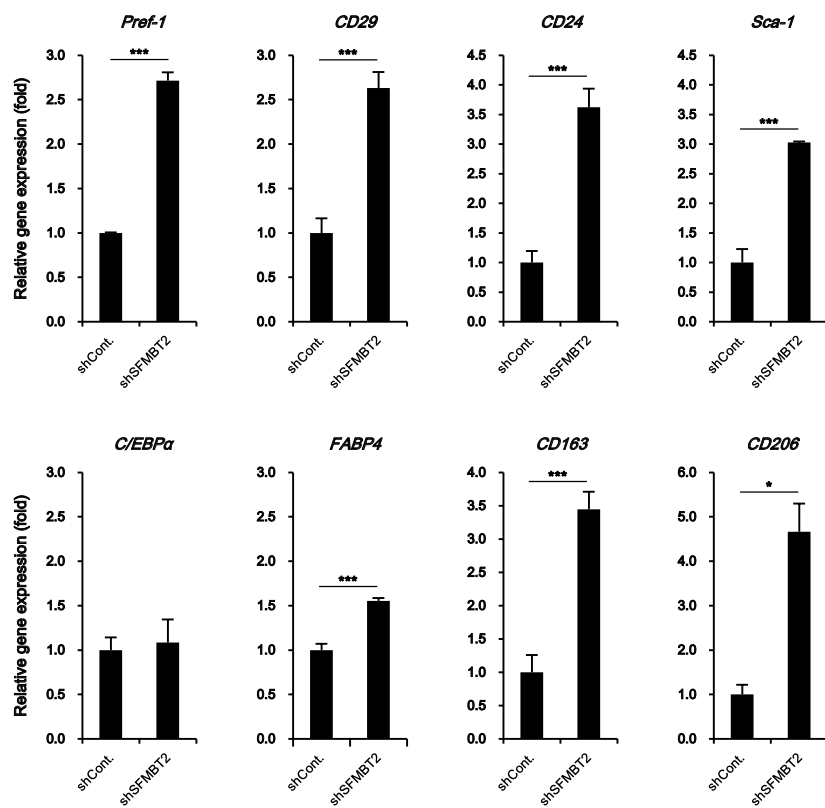

Supplementary Figure S3.

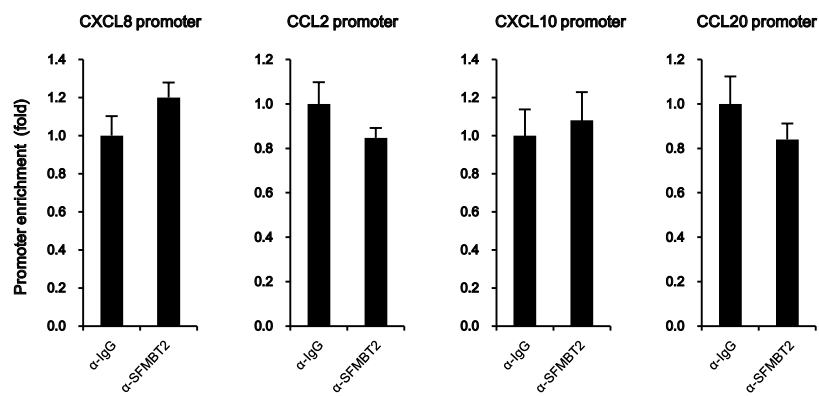

Supplementary Figure S4.



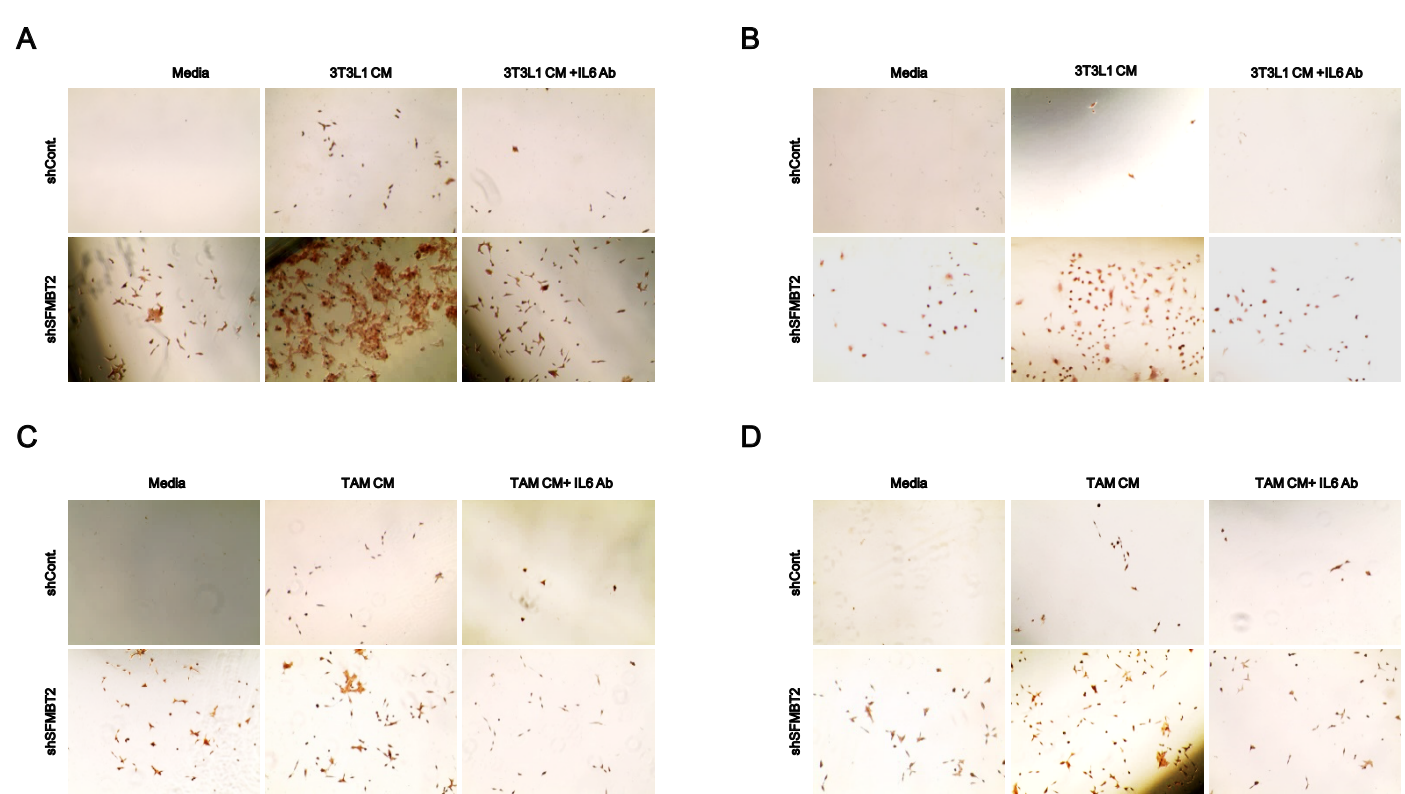

**Supplementary Figure S5.**

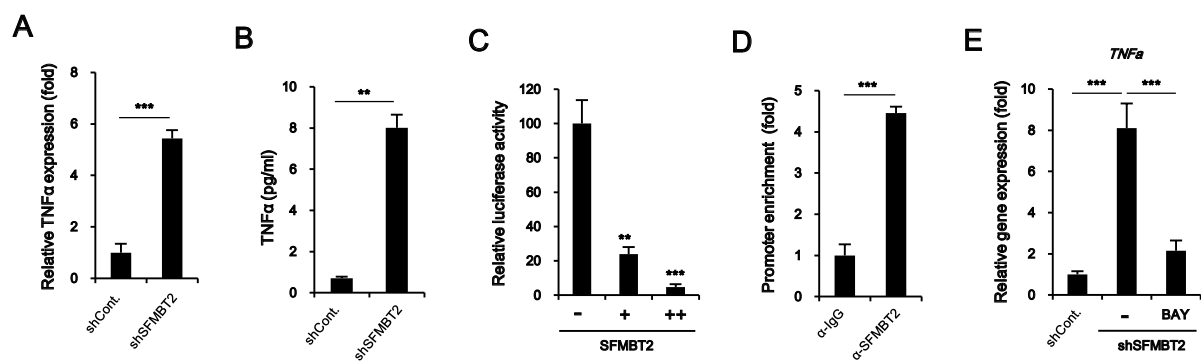

Supplementary Figure S6.

Full blots from Figure 5D (A) and Figure S2C (B)

A

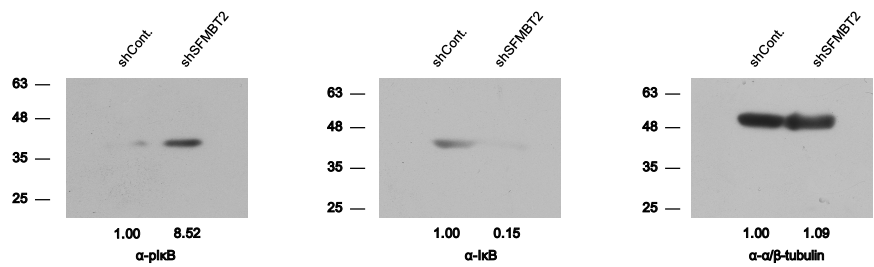

B

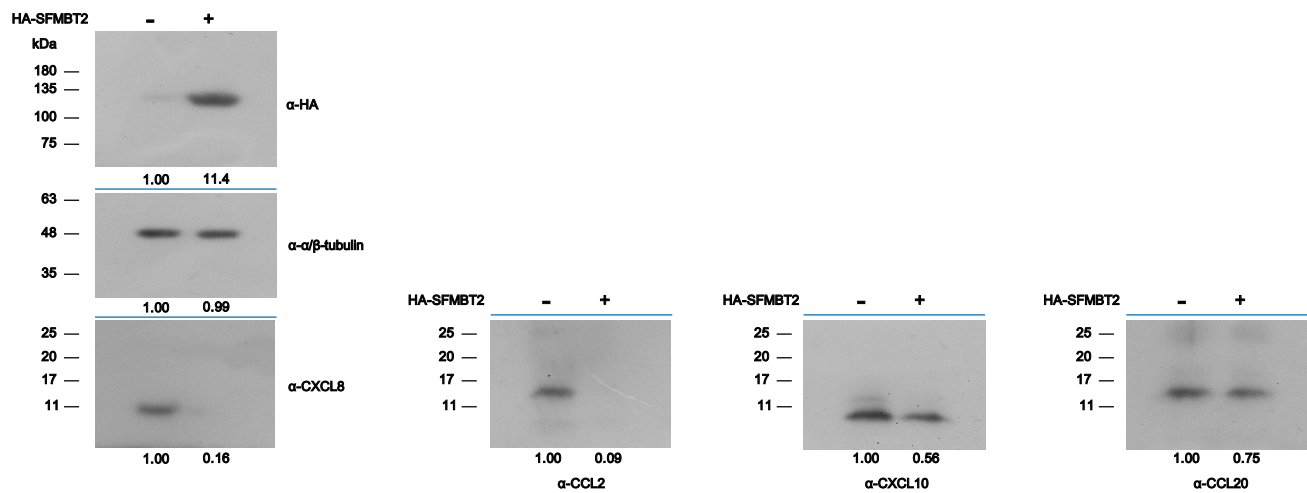

Supplementary Figure S7.

Table S1. Oligonucleotides used in this study.

| Gene                           | Forward Primer                                 | Reverse Primer                                   |
|--------------------------------|------------------------------------------------|--------------------------------------------------|
| <b>qRT-PCR Primers</b>         |                                                |                                                  |
| hSFMBT2                        | 5'- TGACGTAGTCATCGCGATT -3'                    | 5'- ACCAGTCAAGTCACGTATGAGAA -3'                  |
| hCXCL8                         | 5'- ACTGAGAGTGATTGAGAGTGGAC -3'                | 5'- AACCCCTCTGCACCCAGTTTTTC -3'                  |
| hCCL2                          | 5'- ATCACCAGCAGCAAGTGTC -3'                    | 5'- AGGTGGTCCATGGAATCCTG -3'                     |
| hCXCL10                        | 5'- CAGCAGAGGAACCTCCAGTC -3'                   | 5'- GCAGGTACAGCGTACAGTTC -3'                     |
| hCCL20                         | 5'- TGCTGTACCAAGAGTTTGCTC -3'                  | 5'- CGCACACAGACAACTTTTTCTTT -3'                  |
| hTNF $\alpha$                  | 5'- GAGGCCAAGCCCTGGTATG -3'                    | 5'- CGGGCCGATTGATCTCAGC -3'                      |
| h18s rRNA                      | 5'- GTAACCCGTTGAACCCATT -3'                    | 5'- CCATCCAATCGGTAGTAGCG -3'                     |
| mIL6                           | 5'- TAGTCCTTCTACCCCAATTTCC -3'                 | 5'- TTGGTCCTTAGCCACTCCTTC -3'                    |
| mCCR2                          | 5'- ACACCCTGTTTCGCTGTAGG -3'                   | 5'- GATTCCTGGAAGGTGGTCAA -3'                     |
| mCCR4                          | 5'- GGAAGGTATCAAGGCATTTGGG -3'                 | 5'- GTACACGTCGTCATGGACTT -3'                     |
| mCCR6                          | 5'- CTGCACTAGTGAGCGTGTGG -3'                   | 5'- ACCTCTTCTAGGGAGCATGG -3'                     |
| mCXCR1                         | 5'- ATTCGTGTGCGTGGGCATCT -3'                   | 5'- CCCGCAAGGTCATCCGAAAA -3'                     |
| mCXCR2                         | 5'- GACACAGCTCCAGTTAGGGATG -3'                 | 5'- CGAGGTGCTAGGATTTGAGC -3'                     |
| mCXCR3                         | 5'- GCTGTAGCCGATGTTCTGCTGGTG -3'               | 5'- TGCACTATGCTCAGATATCTGTC -3'                  |
| mPref-1                        | 5'- AGTGCGAAACCTGGGTGTC -3'                    | 5'- GCCTCCTGTTGAAAGTGGTCA -3'                    |
| mCD24                          | 5'- TTCTGGCACTGCTCCTACC -3'                    | 5'- GCGTTACTTGATTGTTGGGGAA -3'                   |
| mCD29                          | 5'- ACTGTGATGCCGTATATTAGCAC -3'                | 5'- GATATGCGTTGCTGACCAACA -3'                    |
| mCD163                         | 5'- AAGCATTACTGTCATCATAG -3'                   | 5'- CTCCACCTACAAGTCTAA -3'                       |
| mCD206                         | 5'- CAGGTGTGGGCTCAGGTAGT -3'                   | 5'- TGTGGTGAGCTGAAAGGTGA -3'                     |
| mSca-1                         | 5'- ACAGCACAGGCAGGAAGACT -3'                   | 5'- TCGGTATTATCTTCGGGGC -3'                      |
| mC/EBP $\alpha$                | 5'- TGGACAAGAACAGCAACGAG -3'                   | 5'- TCACTGGTCAACTCCAGCA -3'                      |
| mFABP4                         | 5'- AAGGTGAAGAGCATCATAACCCT -3'                | 5'- TCACGCCTTTCATAACACATTCC -3'                  |
| m18s rRNA                      | 5'- AGTCCCTGCCCTTTGTACACA -3'                  | 5'- CGATCCGAGGGCCTCACTA -3'                      |
| <b>ChIP Primers</b>            |                                                |                                                  |
| CXCL8 (p65)                    | 5'- GGGCCATCAGTTGCAAATC -3'                    | 5'- TTCCTTCCGGTGGTTTCTTC -3'                     |
| CCL2 (p65)                     | 5'- TGGAAAAAGTGTCTCGTCCTGAC -3'                | 5'- GCTGCTGTCTCTGCCTCTTATTGA -3'                 |
| CXCL10 (p65)                   | 5'- AGGAGCAGAGGGAAATTCGTAAC -3'                | 5'- AACGTGGGGCTAGTGTGCCA -3'                     |
| CCL20 (p65)                    | 5'- TGAGGAAAAAGCAGGAAGTTT -3'                  | 5'- GTACACAGAAGGCGTGTTGC -3'                     |
| CXCL8 (YY1)                    | 5'- CCCCCACATTACTCAGAAAGTTACTC -3'             | 5'- GGTGTTAGAAACAAGATCATGGAT<br>GATTTTCTTTA -3'  |
| CCL2 (YY1)                     | 5'- CCCCATTTGCTCATTTGGTCTCAG -3'               | 5'- TGCTGGAGGCGAGAGTGCGA -3'                     |
| CXCL10 (YY1)                   | 5'- CCTTTTCTCACACATTCTAGATACCATC -3'           | 5'- CCTGCTTTGACAGGGTCAAAGATC -3'                 |
| CCL20 (YY1)                    | 5'- CAGGGTCTTCTTCATGACAGCAC -3'                | 5'- ACAGCGATACAAAGGTCAGCCC -3'                   |
| TNF $\alpha$ (YY1)             | 5'- AACTTTCCAAATCCCCGCCCCC -3'                 | 5'- CCAGCGGAAACTTCCTTGGTG -3'                    |
| <b>Promoter cloning Primer</b> |                                                |                                                  |
| TNF $\alpha$ promoter          | 5'- ATGCGGTACCGAGCTCCTGGGAGATATGGC<br>CACA -3' | 5'- ATGCGATATCTCAGTGCTCATGGTGTC<br>CTT TCCAG -3' |

**Table S2. Antibodies used in this study.**

| <b>Antibody</b>         | <b>Cat #</b> | <b>Company</b>           | <b>Application</b> |
|-------------------------|--------------|--------------------------|--------------------|
| CXCL8                   | ab89336      | Abcam                    | IHC, WB            |
| CCL2                    | MABN712      | Millipore                | IHC, WB            |
| CXCL10                  | ab8098       | Abcam                    | IHC, WB            |
| CCL20                   | ab9829       | Abcam                    | IHC, WB            |
| Pref-1                  | 33697        | Novus Biologicals        | IHC                |
| CD29                    | ab183666     | Abcam                    | IHC                |
| CD163                   | A8383        | ABclonal                 | IHC                |
| CD206                   | A8301        | ABclonal                 | IHC                |
| RFP                     | AE020        | ABclonal                 | IHC                |
| pI $\kappa$ B           | 2859S        | Cell signaling           | WB                 |
| I $\kappa$ B            | ab7217       | Abcam                    | WB                 |
| HA                      | AE008        | ABclonal                 | WB                 |
| $\alpha/\beta$ -tubulin | 2148         | Cell signaling           | WB                 |
| p65                     | ab7970       | Abcam                    | ICC, ChIP          |
| p50                     | ab7971       | Abcam                    | ICC, ChIP          |
| AcH3                    | 06-599       | Millipore                | ChIP               |
| p300                    | sc-585       | Santa Cruz Biotechnology | ChIP               |
| IL6                     | A11114       | ABclonal                 | IHC                |
| Anti-Rabbit IgG–TRITC   | T6778        | Sigma                    | IHC, ICC           |
| Anti-Mouse IgG–FITC     | F0257        | Sigma                    | IHC                |
| Anti-Mouse IgG–HRP      | sc-2005      | Santa Cruz Biotechnology | WB                 |
| Anti-Rabbit IgG–HRP     | sc-2357      | Santa Cruz Biotechnology | WB                 |

**IHC:** Immunohistochemistry, **WB:** Western blot, **ICC:** Immunocytochemistry, **ChIP:** Chromatin Immunoprecipitation

**Table S3. Chemokines and Cytokines used in this study.**

| <b>Chemokine/Cytokine</b> | <b>Cat #</b> | <b>Company</b> |
|---------------------------|--------------|----------------|
| <b>CXCL8</b>              | 200-08M      | Pepro Tech     |
| <b>CCL2</b>               | 300-04       | Pepro Tech     |
| <b>CXCL10</b>             | 300-12       | Pepro Tech     |
| <b>CCL20</b>              | 300-29A      | Pepro Tech     |
| <b>IL4</b>                | 200-04       | Pepro Tech     |
| <b>IL13</b>               | 200 13       | Pepro Tech     |

**Table S4. Characteristics of prostate cancer patients in tissue array used in this study.**

| Characteristics                            | N (%)           |
|--------------------------------------------|-----------------|
| <b>Gender</b>                              | Male            |
| <b>Mean age in year (range)</b>            | 64.98 (44-72)   |
| <b>Mean preoperative PSA ng/ml (range)</b> | 26.64 (0.5-161) |
| <b>pTNM pathologic classification</b>      |                 |
| pT2a                                       | 1 (2.5%)        |
| pT2b                                       | 7 (17.5%)       |
| pT3                                        | 32 (80.0%)      |
| <b>Gleason score</b>                       |                 |
| 4-7                                        | 17 (42.5%)      |
| 8-10                                       | 23 (57.5%)      |

**N:** Patient number, **PSA:** Prostate-specific antigen, **pTNM:** Pathological tumor-node-metastasis

**pT2a:** Tumor affects one-half of one lobe or less

**pT2b:** Tumor affects more than one-half of one lobe but not both lobes

**pT3:** Tumor extends beyond the prostate

**Table S5. Relationship between expression level of SFMBT2 and Gleason Score.**

| Gleason Score | SFMBT2 expression |              |             | Total cases (%) |
|---------------|-------------------|--------------|-------------|-----------------|
|               | High (%)          | Moderate (%) | Low (%)     |                 |
| <b>= 2</b>    | 8 (88.88%)        | 1 (11.11%)   | 0 (0%)      | 9 (100%)        |
| <b>≤ 7</b>    | 1 (5.90%)         | 8 (47.06%)   | 8 (47.06%)  | 17 (100%)       |
| <b>≥ 8</b>    | 1 (4.34%)         | 2 (8.70%)    | 20 (86.96%) | 23 (100%)       |

There is significant difference  $P<0.001$ .
